# Supplementary material
Source: publisher figshare collection journal article supplement (https://karger.figshare.com/ndownloader/files/28970601)
Supplement: Supplementary file 1 [file 28970601]

| Supplementary table 5. Adjusted effects of various factors on regional brain volumes of DMN areas at baseline among patients without diabetes mellitus. (n=129) | | | | | | | | | | | | | | |
| --- | --- | --- | --- | --- | --- | --- | --- | --- | --- | --- | --- | --- | --- | --- |
| DMN ROI | Model 1a | | | | | | | Model 2b | | | | | | |
| R^2 | Age | | HbA1c | | CIRS-G-TS | | R^2 | Age |  | HbA1c |  | CIRS-G-SI |  |
| β(SE) | p† | β(SE) | p† | β(SE) | p† | β(SE) | p† | β(SE) | p† | β(SE) | p† |
| Hippocampus (L) | 0.12 | **-22.69(6.18)** | **0.004*** |  |  |  |  | 0.12 | **-22.69(6.18)** | **0.003*** |  |  |  |  |
| Hippocampus (R) | 0.14 | **-23.35(5.90)** | **0.002*** |  |  |  |  | 0.14 | **-23.35(5.90)** | **0.002*** |  |  |  |  |
| Medial orbitofrontal (L) |  |  |  |  |  |  |  |  |  |  |  |  |  |  |
| Medial orbitofrontal (R) | 0.05 | -16.19(8.85) | 0.100 |  |  |  |  | 0.05 | -16.19(8.85) | 0.091 |  |  |  |  |
| Rostral anterior cingulate (L) | 0.11 | **-25.32(7.40)** | **0.006*** |  |  |  |  | 0.11 | **-25.32(7.40)** | **0.005*** |  |  |  |  |
| Rostral anterior cingulate (R) | 0.03 | -13.38(6.95) | 0.089 |  |  |  |  | 0.03 | -13.38(6.95) | 0.085 |  |  |  |  |
| Caudal anterior cingulate (L) | 0.04 |  |  |  |  |  |  | 0.04 |  |  |  |  |  |  |
| Caudal anterior cingulate (R) | 0.02 | -12.76(7.38) | 0.117 |  |  |  |  | 0.05 | -15.06(7.42) | 0.085 |  |  | 119.59(66.09) | 0.091 |
| Posterior cingulate (L) | 0.08 | -8.67(5.99) | 0.150 | **176.69(69.84)** | **0.042*** | -15.27(7.20) | 0.067 | 0.04 |  |  | 155.17(70.45) | 0.077 |  |  |
| Posterior cingulate (R) | 0.08 | **-20.52(6.05)** | **0.006*** |  |  |  |  | 0.11 | **-22.42(6.09)** | **0.003*** |  |  | 98.78(54.23) | 0.091 |
| Isthmus (L) | 0.05 |  |  |  |  |  |  | 0.05 |  |  |  |  |  |  |
| Isthmus (R) | 0.15 | **-18.57(4.72)** | **0.002*** |  |  |  |  | 0.15 | **-18.57(4.72)** | **0.002*** |  |  |  |  |
| Precuneus (L) | 0.08 | **-38.65(12.89)** | **0.016*** |  |  |  |  | 0.08 | **-38.65(12.89)** | **0.016*** |  |  |  |  |
| Precuneus (R) | 0.14 | **-31.93(12.88)** | **0.043*** |  |  | -25.96(15.53) | 0.121 | 0.15 | -26.19(12.98) | 0.085 |  |  | -248.01(114.63) | 0.077 |
| Supramarginal (L) |  |  |  |  |  |  |  |  |  |  |  |  |  |  |
| Supramarginal (R) | 0.10 | **-47.03(18.35)** | **0.042*** |  |  | **-59.91(21.90)** | **0.031*** | 0.09 | -36.65(18.65) | 0.085 |  |  | **-439.59(166.11)** | **0.039*** |
| Abbreviations: DMN, default mode network; ROI, region of interest; L, left hemisphere; R, right hemisphere; β, unstandardized regression coefficient; SE, standard error. a Stepwise regression model: Dependent variable: regional volume of each area in DMN. Covariates include age, gender, BMI, years of education, CIRS-G-TS, and HbA1c.  b Stepwise regression model: Dependent variable: regional volume of each area in DMN. Covariates include age, gender, BMI, years of education, CIRS-G-SI, and HbA1c.  † Adjusted p-value via Benjamini-Hochberg procedure. * p<.05 | | | | | | | | | | | | | | |
|  |
|  |
|  |
|  |
